# Supplementary material for: lncRNA GPRC5D-AS1 as a ceRNA inhibits skeletal muscle aging by regulating miR-520d-5p
Source: publisher site journal article supplement (doi:10.18632/aging.205279), 2023-12-09
Supplement: Supplementary file [file aging-v15i23-205279-supplementary-material-SD1.pdf]

## SUPPLEMENTARY TABLE

Supplementary Table 1. Summarized cell cycle data.

|           |       | Experiment 1 (%) | Experiment 2 (%) | Experiment 3 (%) | Mean (%) | SD     |
|-----------|-------|------------------|------------------|------------------|----------|--------|
| Control   | G0/G1 | 59.29            | 60.81            | 58.54            | 59.5467  | 1.1566 |
|           | S     | 15.01            | 14.97            | 18.64            | 16.2067  | 2.1074 |
|           | G2/M  | 25.7             | 24.22            | 22.82            | 24.2467  | 1.4402 |
| Model     | G0/G1 | 54.05            | 54.55            | 54.14            | 54.2467  | 0.2665 |
|           | S     | 2.03             | 3.01             | 4.16             | 3.0667   | 1.0661 |
|           | G2/M  | 43.92            | 42.44            | 41.7             | 42.6867  | 1.1304 |
| NC        | G0/G1 | 53.29            | 55.93            | 55.26            | 54.8267  | 1.3723 |
|           | S     | 4.81             | 1.06             | 2.97             | 2.9467   | 1.8751 |
|           | G2/M  | 41.9             | 43.01            | 41.77            | 42.2267  | 0.6815 |
| lncRNA-OE | G0/G1 | 61.51            | 63.02            | 63.07            | 62.5333  | 0.8866 |
|           | S     | 6.74             | 8.68             | 9.68             | 8.3667   | 1.4948 |
|           | G2/M  | 31.75            | 28.3             | 27.25            | 29.1000  | 2.3543 |
